# Supplementary material
Source: HighWire-hosted journal article supplement (https://bmjopen.bmj.com/content/8/5/e020634)
Supplement: inline-supplementary-material-1 [file inline-supplementary-material-1.pdf]

Supplement Table 1 Details of RPD patients with specific diagnosis

| Case | No. | Gender | APPD(mm) |       | CAKUT (Side) | Management                           | Surgery<br>age (m) | Post operation<br>condition                                 |
|------|-----|--------|----------|-------|--------------|--------------------------------------|--------------------|-------------------------------------------------------------|
|      |     |        | Left     | Right |              |                                      |                    |                                                             |
| 1    | GXN | M      | 21       | -     | UPJO (L)     | Pyeloplasty                          | 1.5                | RPD alleviated<br>distinctly<br>DRF 40.5%(6 mths<br>after)  |
| 2    | LZY | M      | -        | 38    | UPJO (R)     | Pyeloplasty                          | 1.5                | RPD alleviated<br>distinctly                                |
| 3    | WZC | M      | 8        | 60    | UPJO(R)      | External<br>drainage+<br>Pyeloplasty | 1.6                | RPD alleviated<br>distinctly                                |
| 4    | CJ  | M      | 24       | -     | UPJO (L)     | Pyeloplasty                          | 8.0                | RPD alleviated<br>distinctly                                |
| 5    | GYX | M      | -        | 21    | UPJO (R)     | Pyeloplasty                          | 2.0                | RPD alleviated<br>distinctly<br>DRF 46.6% (6 mths<br>after) |
| 6    | ZCX | M      | 11       | 9     | UPJO (L)     | Follow-up                            | -                  |                                                             |

|    |     |   |    |    |                                                                       |                                                             |      |                                                                |
|----|-----|---|----|----|-----------------------------------------------------------------------|-------------------------------------------------------------|------|----------------------------------------------------------------|
| 7  | ZXY | F | 14 | 7  | RD (Bi)<br>Ureterectasia (L)<br>Ureterocele (L)                       | Transurethral<br>endoscopic<br>unroofing of<br>ureteroceles | 2.0  | RPD and<br>Ureterectasia<br>alleviated<br>No UTI<br>DRF normal |
| 8  | ZWS | M | 8  | -  | RD with ipsilateral severe<br>RPD and ectopic ureteral<br>orifice (L) | Ureteral<br>reimplantation                                  | 27.0 | RPD and<br>Ureterectasia<br>alleviated<br>DRF normal           |
| 9  | JFR | M | 12 | -  | RD(L)<br>RD+ upper UPJO                                               | LUPPN                                                       | 36.0 | RPD alleviated<br>distinctly                                   |
| 10 | ZSR | F | -  | 15 | MU(R)                                                                 | Ureteral<br>reimplantation                                  | 27.0 | Ureterectasia<br>alleviated<br>DRF<40%                         |
| 11 | JHB | M | 8  | -  | MU(L)                                                                 | Follow-up                                                   | -    |                                                                |

L: Left; R: Right; Bi: Bilateral; MU: Megaureter; RD: Renal duplication; DRF: differential renal function; LUPPN: laparoscopic upper pole partial nephrectomy.
